# Supplementary material for: Endothelial cells promote 3D invasion of GBM by IL-8-dependent induction of cancer stem cell properties
Source: PubMed Central journal article supplement (PMC6588602; doi:10.1038/s41598-019-45535-y), 2019-06-21

# Endothelial cells promote 3D invasion of GBM by IL-8-dependent induction of cancer stem cell properties

*Michael G. McCoy<sup>1</sup>, Dennis Nyanyo<sup>1</sup>, Carol K. Hung<sup>1</sup>, Julian Palacios Goerger<sup>1</sup>, Warren Zipfel<sup>1</sup>, Rebecca M. Williams<sup>1</sup>, Nozomi Nishimura<sup>1</sup>, Claudia Fischbach<sup>1,2\*</sup>*

<sup>1</sup>Nancy E. and Peter C. Meinig School of Biomedical Engineering, Cornell University, Ithaca, NY 14853, United States

<sup>2</sup>Kavli Institute at Cornell for Nanoscale Science, Cornell University, Ithaca, NY 14853, United States

\*Corresponding Author

Email: [CF99@cornell.edu](mailto:CF99@cornell.edu)

Keywords: Glioblastoma, Cancer Stem Cell, Interleukin-8, Tumor Cell Invasion, Perivascular Niche

### **Supplemental Figure 1**

(a) Confocal micrographs of the periphery of GBM co-culture spheroids (nestin, labeled green) visualizing directional alignment of endothelial cell (mCherry, labeled red) towards the spheroid.

(b) Left: Quantification of the frequency of endothelial cell co-localization with GBM invasions ('sprouts') following 3 and 7 days of culture. Middle, Right: Measurement of the incident angle of both tumor cell invasions and endothelial cells relative to the spheroid surface demonstrate different growth and migration angles after 3, but not 7 days of culture suggesting increasing alignment over time. \*\* and \*\*\*\* indicate P-values less than 0.01 and 0.001, respectively.

### **Supplemental Figure 2**

Analyzing data from The Cancer Genome Atlas (TCGA) with the National Cancer Institute's Glioblastoma Bio Discovery Portal suggested a negative correlation between IL-8 and patient survival by revealing that IL-8 z-scores were increased in patients with lower *vs.* upper quartile survival. LQ refers to lower quartile and UQ refers to upper quartile. \* indicates a P-value of less than 0.05.

Supplementary Figure 1

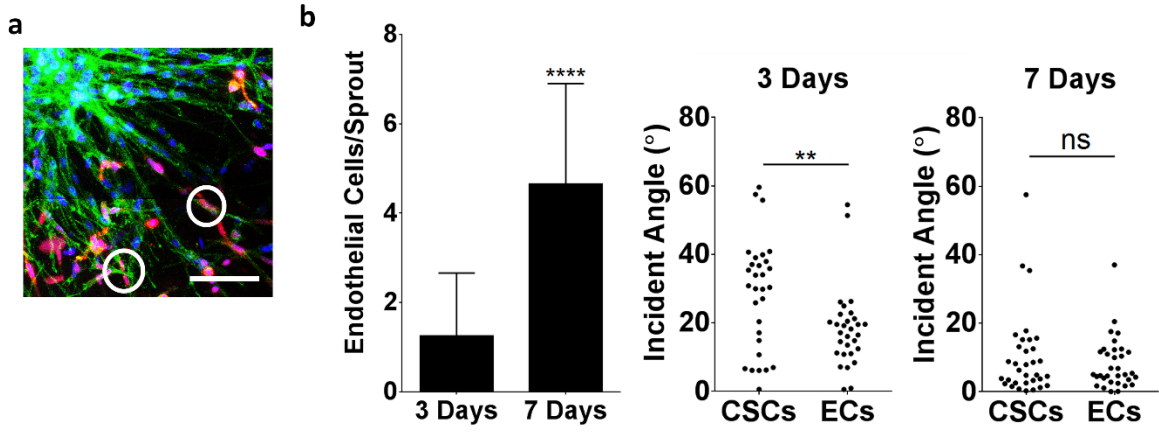

Supplementary Figure 2

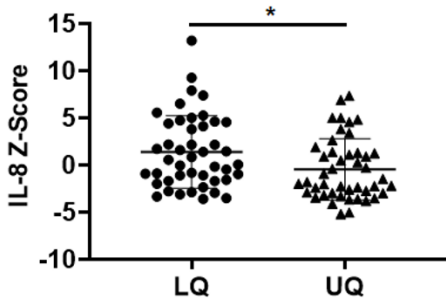

Supplement: 41598_2019_45535_MOESM1_ESM.pdf [file 41598_2019_45535_MOESM1_ESM.pdf]
